# Supplementary material
Source: PubMed Central journal article supplement (PMC7655366)
Supplement: 18-00611.pdf [file 18-00611.pdf]

**On-line Table: Demographics, clinical presentation, and neuroimaging findings**

| Patient         | Age (yr)/Sex/<br>Ethnicity | Main Clinical Findings                                                                                                  | Typical ACTA2<br>Neurovascular<br>Abnormalities <sup>a</sup> | Bending/Hypoplasia<br>Anterior Corpus<br>Callosum | Abnormal Radial<br>Gyration Frontal<br>Lobes                                         | Cortical<br>Malformations | Absent Anterior<br>Cingulate<br>Gyrus | Twin Peaks<br>Pons | Squeezed<br>Midbrain | Paramedian<br>Indentation of<br>Pontine Surface | Large Territorial<br>Infarctions | Watershed<br>Infarctions |
|-----------------|----------------------------|-------------------------------------------------------------------------------------------------------------------------|--------------------------------------------------------------|---------------------------------------------------|--------------------------------------------------------------------------------------|---------------------------|---------------------------------------|--------------------|----------------------|-------------------------------------------------|----------------------------------|--------------------------|
| 1               | 23 months/F/Pakistani      | PDA, congenital mydriasis, pulmonary hypertension, right hemiparesis                                                    | Yes                                                          | Yes                                               | Yes                                                                                  | No                        | Yes                                   | No                 | No                   | No                                              | Yes                              | Yes                      |
| 2               | 4/F/white                  | PDA, congenital mydriasis, bilateral hemiparesis, swallowing difficulties                                               | Yes                                                          | Yes                                               | Yes                                                                                  | No                        | Yes                                   | Yes                | Yes                  | Yes                                             | Yes                              | Yes                      |
| 3               | 9/F/white                  | PDA, multiple TIAs, hypo-contractile bladder, left hemiatrophy of toes and foot                                         | Yes                                                          | Yes                                               | Yes                                                                                  | No                        | Yes                                   | Yes                | Yes                  | Yes                                             | Yes                              | Yes                      |
| 4               | 10/M/white                 | PDA, congenital mydriasis, unilateral vocal cord paresis, cardiac arrest in newborn period                              | Yes                                                          | Yes                                               | Yes                                                                                  | No                        | Yes                                   | Yes                | Yes                  | Yes                                             | No                               | Yes                      |
| 5               | 10/M/white                 | PDA, right femoral artery occlusion, dilation aortic arch, pulmonary hypertension                                       | Yes                                                          | Yes                                               | Yes                                                                                  | No                        | Yes                                   | Yes                | No                   | Yes                                             | Yes                              | Yes                      |
| 6               | 4/F/Arabic                 | PFO, thrombophilia, dystonic left hemiparesis, possible seizures                                                        | Yes                                                          | Yes                                               | Yes                                                                                  | No                        | Yes                                   | Yes                | Yes                  | Yes                                             | No                               | Yes                      |
| 7               | 3/F/white                  | Aneurysmal PDA, congenital mydriasis, dilation of ascending aorta                                                       | Yes                                                          | Yes                                               | Yes                                                                                  | No                        | Yes                                   | Yes                | No                   | Yes                                             | No                               | Yes                      |
| 8               | 1/F/white                  | PDA, congenital mydriasis, pulmonary hypertension, decreased due to sepsis                                              | Yes                                                          | Yes                                               | Yes                                                                                  | No                        | Yes                                   | Yes                | Yes                  | Yes                                             | No                               | Yes                      |
| 9               | 1/M/Arabic                 | PDA, congenital mydriasis, bulbar palsy, pulmonary hypertension                                                         | Yes                                                          | Yes                                               | Yes                                                                                  | No                        | Yes                                   | Yes                | Yes                  | Yes                                             | No                               | Yes                      |
| 10              | 4/F/white                  | Congenital mydriasis, developmental and speech delays                                                                   | Yes                                                          | Yes                                               | Yes                                                                                  | No                        | Yes                                   | Yes                | Yes                  | Yes                                             | Yes                              | Yes                      |
| 11              | 8/F/Arabic                 | PDA, congenital mydriasis hands, clumsiness, recurrent TIA                                                              | Yes                                                          | Yes                                               | Yes                                                                                  | No                        | Yes                                   | Yes                | Yes                  | Yes                                             | No                               | Yes                      |
| 12              | 11/F/white                 | PDA, aortic dissection, congenital cataracts, cognitive decline                                                         | Yes                                                          | Yes                                               | Yes                                                                                  | No                        | Yes                                   | Yes                | Yes                  | Yes                                             | No                               | Yes                      |
| 13              | 6/M/white                  | PDA, congenital mydriasis, left hemiparesis                                                                             | Yes                                                          | Yes                                               | Yes                                                                                  | No                        | Yes                                   | Yes                | Yes                  | Yes                                             | Yes                              | Yes                      |
| 14              | 3/F/white                  | PDA, congenital mydriasis, recurrent TIAs                                                                               | Yes                                                          | Yes                                               | Yes                                                                                  | No                        | Yes                                   | Yes                | Yes                  | Yes                                             | No                               | Yes                      |
| 15 <sup>b</sup> | 33/F/Black                 | Pseudobulbar palsy, left-sided pyramidal weakness, swallowing difficulties [symptoms started when she was 10 yr of age] | Yes                                                          | Yes                                               | Yes (also abnormal posterior temporal gyration in relation to strengthening of PCAs) | No                        | Yes                                   | Yes                | Yes                  | Yes                                             | No                               | Yes (few foci)           |

**Note:**—PDA indicates patent ductus arteriosus; Pt, patient; PFO, persistent foramen ovale; PCA, posterior cerebellar artery.

<sup>a</sup> Distinctive ACTA2 cerebrovascular features are dilation of the proximal internal carotid arteries, occlusion of the distal internal carotid arteries, a straight course of arteries of the circle of Willis, and absence of Moyamoya collaterals.

<sup>b</sup> Genetic test was not performed, and clinical context was nonpathognomonic for the ACTA2 mutation.
